# Supplementary material
Source: PubMed Central journal article supplement (PMC7370864)
Supplement: NIHMS1608431-supplement-Supporting_Information.pdf [file NIHMS1608431-supplement-Supporting_Information.pdf]

Supporting Information for  
**Automated continuous evolution of proteins *in vivo***

Ziwei Zhong<sup>1,\*</sup>, Brandon G. Wong<sup>2,3,\*</sup>, Arjun Ravikumar<sup>1,2,3</sup>, Garri A. Arzumanyan<sup>1</sup>, Ahmad S. Khalil<sup>2,3,4,#</sup>, and Chang C. Liu<sup>1,5,6,#</sup>

<sup>1</sup>Department of Biomedical Engineering, University of California, Irvine, California, USA.

<sup>2</sup>Biological Design Center, Boston University, Boston, Massachusetts, USA.

<sup>3</sup>Department of Biomedical Engineering, Boston University, Boston, Massachusetts, USA.

<sup>4</sup>Wyss Institute for Biologically Inspired Engineering, Harvard University, Boston, Massachusetts, USA.

<sup>5</sup>Department of Chemistry, University of California, Irvine, California, USA.

<sup>6</sup>Department of Molecular Biology & Biochemistry, University of California, Irvine, California, USA.

\*These authors contributed equally to this work.

#Correspondence to: Chang C. Liu ([ccl@uci.edu](mailto:ccl@uci.edu)) and Ahmad S. Khalil ([khalil@bu.edu](mailto:khalil@bu.edu))

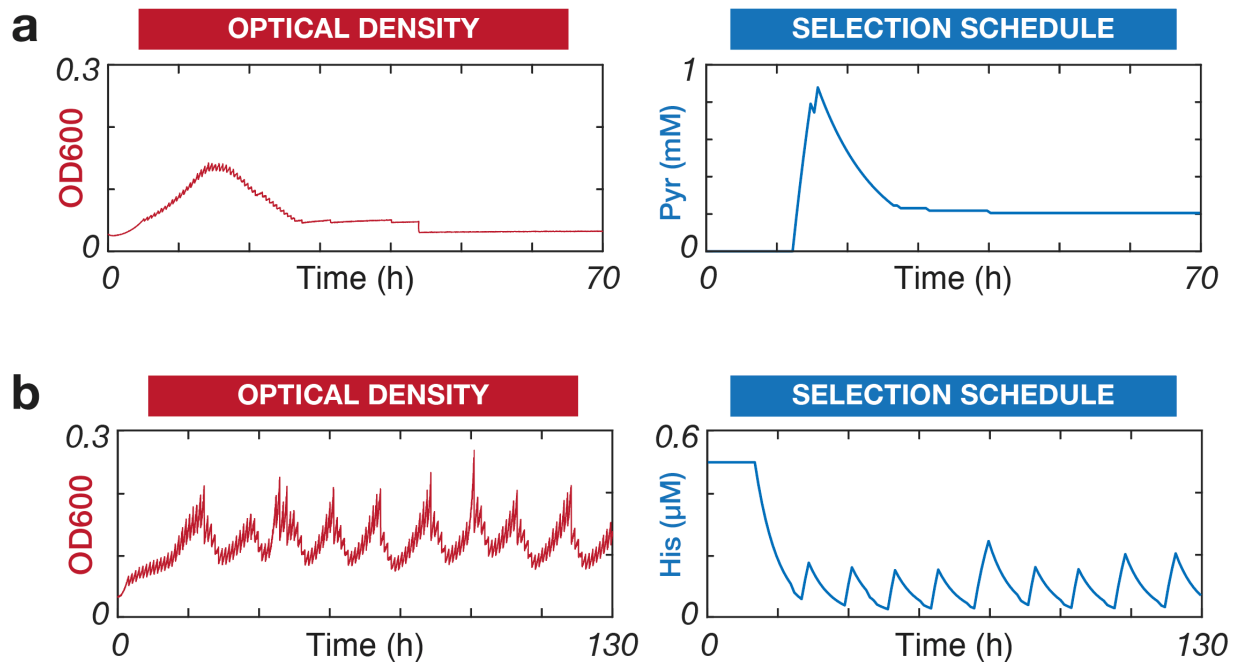

**Figure S1.** Sample evolution experiments in eVOLVER using the control algorithm derived from Toprak et al., 2013.<sup>19</sup> Briefly, this algorithm sampled OD at fixed intervals and if (1) the current OD is greater than a threshold and (2) if the current OD is greater than the previous OD, the growing cultures were diluted with the selection media. Otherwise, the culture would be diluted with the base media **(a)** An example of *PfDHFR* evolution using the Toprak *et al.* algorithm. ZZ-Y435 was inoculated into eVOLVER and grown as described in **Methods** except the control algorithm was as described in Toprak *et al.*<sup>19</sup> The OD of the adapting culture (red) and the calculated concentration of pyrimethamine (blue) are shown. After the initial increase and subsequent decrease of pyrimethamine, no further growth is seen in 40 hours. **(b)** An example of *TmHisA* evolution using the Toprak *et al.*<sup>19</sup> algorithm. ZZ-Y323 was inoculated into eVOLVER and grown as described in **Methods** except for the control algorithm. The OD of the adapting culture (red) and the calculated concentration of histidine in the media (blue) are shown. The concentration of histidine is observed to oscillate during selection and is unable to successfully adapt.

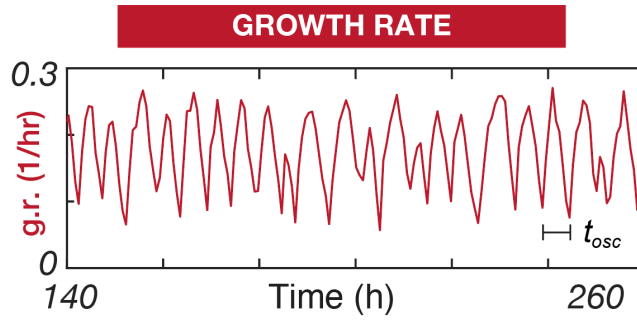

**Figure S2.** Oscillation of growth rate of ZZ-Y323 during the empirical determination of PID settings. ZZ-Y323 was inoculated into eVOLVER and SC-UL was used as the base media and SC-ULH was used as the full adaptation media.  $K_p$  was iterated from 0 to 4 over 120 hours while  $K_I$  and  $K_D$  were set to zero. Oscillations were observed when  $K_p = 4$ , and the period and amplitude of the oscillation were used to estimate the parameters for the PID control algorithm.

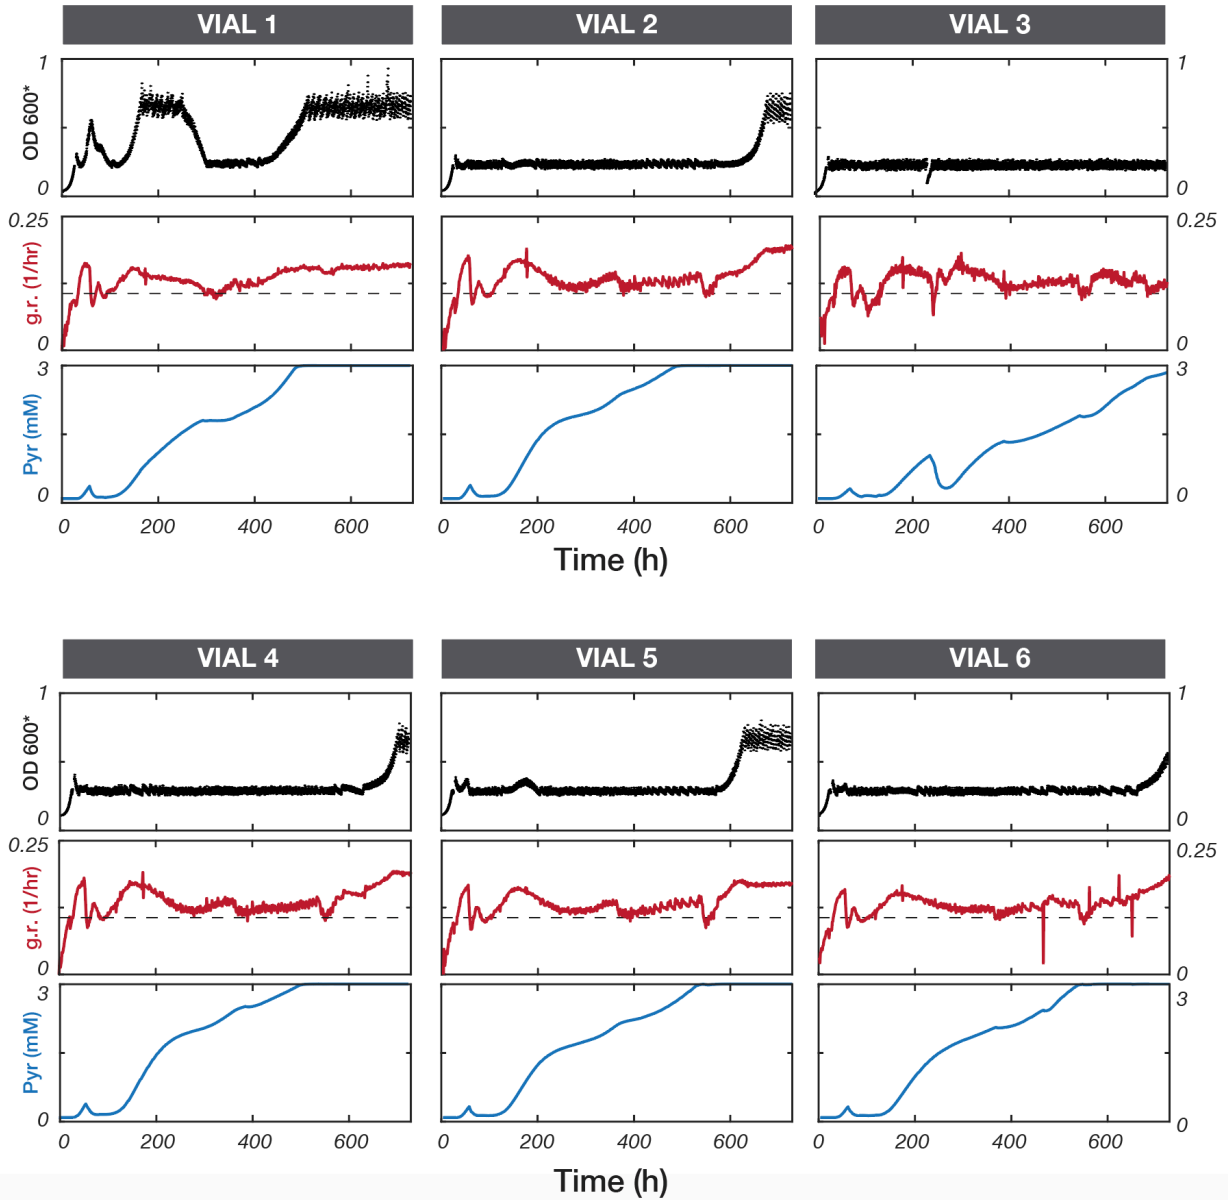

**Figure S3.** Adaptation history for all six replicates during *Pf*DHFR evolution. OD (black dot), growth rate (red line), target growth rate (black dash), and pyrimethamine concentration (blue line) are plotted for all six independent replicates. All six independent cultures were able to adapt to 3 mM pyrimethamine without the need for pre-programmed selection schedules or user intervention except to replenish media stocks.

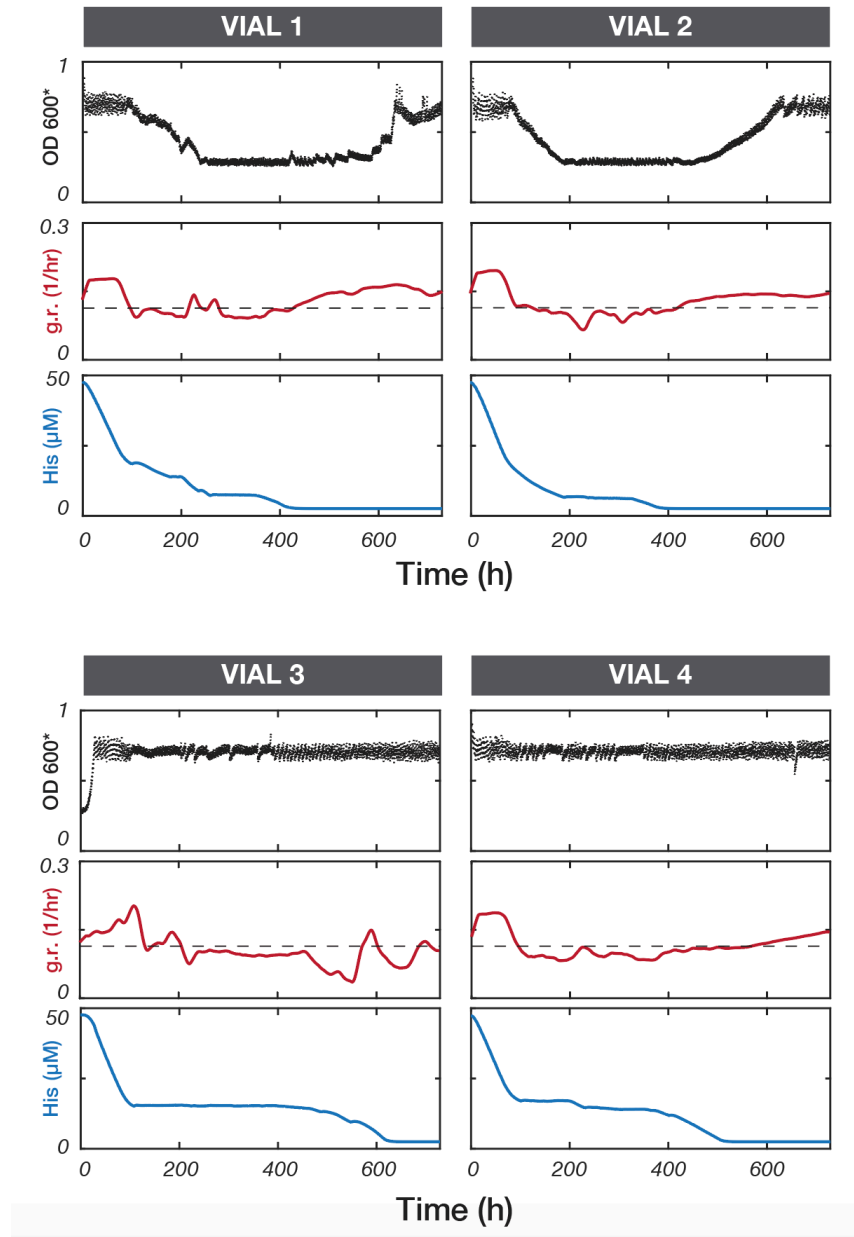

**Figure S4.** Adaptation history for all four replicates during *TmHisA* evolution. OD (black dot), growth rate (red line), and histidine concentration (blue line) are plotted for all six independent replicates. All four cultures were able to adapt to media lacking histidine without the need for evolution schedules or user intervention except to provide eVOLVER with fresh base and full adaptation media in 700 hours of growth.

**Table S1. *TmHisA* mutants characterized.** Both nonsynonymous mutations (**bold**) and synonymous are noted. The order of these variants (top to bottom) corresponds to the order of the variants (left to right) in Figure 3c.

| <b>Name</b> | <b>Mutations from wt <i>TmHisA</i></b>                                                                                                                                                           |
|-------------|--------------------------------------------------------------------------------------------------------------------------------------------------------------------------------------------------|
| V1-1        | <b>E37G</b> , N62N, <b>E71G</b> , <b>L85F</b> , R98R, <b>F124L</b> , K168K, <b>K182R</b> , E186E, S202S, <b>V209A</b> , <b>F226S</b>                                                             |
| V1-3        | <b>G12E</b> , <b>E29K</b> , <b>V36M</b> , <b>H75Y</b> , <b>I185T</b> , <b>R224K</b>                                                                                                              |
| V1-4        | F27F, <b>I40T</b> , G43G, <b>E71G</b> , <b>F72L</b> , L112L, V123V, D127D, <b>A140T</b> , E186E, <b>V209A</b>                                                                                    |
| V1-6        | <b>E37G</b> , <b>E71G</b> , <b>F124L</b> , L126L, E186E, <b>S199P</b> , <b>V209A</b>                                                                                                             |
| V2-1        | <b>A15V</b> , <b>E37G</b> , <b>E71R</b> , D108D, <b>F124L</b> , L172L, E186E, <b>V209A</b>                                                                                                       |
| V2-2        | <b>V4A</b> , <b>A15V</b> , <b>Y28H</b> , <b>E37G</b> , <b>E71G</b> , <b>S102G</b> , <b>A134V</b> , V147V, <b>D176Y</b> , <b>K182E</b> , <b>I183T</b> , E186E, <b>V209A</b> , T213T, <b>E228K</b> |
| V2-4        | <b>I18T</b> , <b>E71G</b> , <b>K181R</b> , <b>V209A</b> , <b>I221V</b>                                                                                                                           |
| V3-1        | <b>H2Q</b> , A6A, <b>E71G</b> , <b>F72L</b> , V123V, <b>V133A</b> , E186E, E188E, <b>V209A</b> , <b>E234G</b>                                                                                    |
| V3-2        | <b>H2Q</b> , A6A, D8D, <b>N24S</b> , <b>E71G</b> , <b>F72L</b> , V123V, <b>V133A</b> , E186E, E188E, <b>V209A</b> , <b>E234G</b>                                                                 |
| V3-3        | <b>H2Q</b> , A6A, V14V, <b>E71G</b> , <b>F72L</b> , V123V, <b>V133A</b> , <b>I161V</b> , E186E, E188E, <b>V209A</b> , <b>E234G</b>                                                               |
| V3-5        | <b>H2Q</b> , A6A, <b>E71G</b> , <b>F72L</b> , <b>I82V</b> , V123V, <b>V133A</b> , <b>G170D</b> , E186E, E188E, <b>V209A</b> , <b>E234G</b>                                                       |
| V4-1        | <b>V4A</b> , <b>F27S</b> , <b>V36M</b> , E41E, R97R, S125S, <b>M236T</b>                                                                                                                         |
| V4-2        | <b>E71G</b> , <b>F72L</b> , <b>V105A</b> , V123V, <b>I144T</b> , E186E, <b>S199A</b> , <b>V209A</b> , <b>G223R</b>                                                                               |
| V4-3        | D8D, <b>V14I</b> , <b>E37G</b> , <b>E71G</b> , <b>F135L</b> , <b>S148P</b> , L149L, E186E, <b>L203S</b> , <b>K208R</b> , <b>V209A</b> , <b>F226L</b>                                             |
| V4-4        | <b>V4A</b> , <b>N24S</b> , <b>V36M</b> , G60G, R97R, <b>E107G</b> , <b>F124Y</b> , <b>I166T</b> , <b>I221V</b> , <b>M236T</b>                                                                    |
| V4-5        | <b>H2Q</b> , <b>I7V</b> , <b>A15V</b> , K22K, E29E, <b>V36M</b> , I47I, E67E, <b>F124L</b> , <b>E143G</b> , <b>D145N</b> , <b>V147A</b> , K181K, E188E                                           |

**Table S2. List of plasmids used in this study.** For plasmids ZZ-Ec903 to ZZ-Ec918, see Table S1 for specific sequences.

| Name                    | Source                             | Parent Plasmid         | Origin of replication (yeast, bacterial) | Selection Marker (yeast, bacterial) | Notes                                                                                                                                                   |
|-------------------------|------------------------------------|------------------------|------------------------------------------|-------------------------------------|---------------------------------------------------------------------------------------------------------------------------------------------------------|
| GA-DNA- <i>flo1URA3</i> | This work                          | n/a                    | n/a                                      | URA3, n/a                           | Used to delete <i>flo1</i> in strains in order to prevent flocculation                                                                                  |
| GA-Ec51                 | Ravikumar et al. 2018 <sup>2</sup> | See previous work      | CEN6/ARS4, ColE1                         | URA3, AmpR                          |                                                                                                                                                         |
| GA-Ec64                 | Ravikumar et al. 2018 <sup>2</sup> | See previous work      | n/a, ColE1                               | TRP1, AmpR                          | Recombination cassette that integrates TRP1, mKate2, <i>PfDHFR</i> , and <i>leu2</i> (538C>T) in place of wt TP-DNAP1 on the orthogonal plasmid (pGKL1) |
| AR-Ec633                | Ravikumar et al. 2018 <sup>2</sup> | See previous work      | CEN6/ARS4, ColE1                         | HIS3, KanR                          | REV1 promoter > TP-DNAP1 L477V, L640Y, I777K, W814N                                                                                                     |
| ZZ-Ec482                | This work                          | AJ-Ec200 <sup>27</sup> | 2 $\mu$ , ColE1                          | NatMX, AmpR                         | contains sgRNA targeting <i>TRP1</i> ( <i>GTCCATTGGTGAAAGTTTG</i> )                                                                                     |
| ZZ-Ec475                | This work                          | GA-Ec64                | n/a, ColE1                               | URA3, AmpR                          | p1 recombination cassette that integrates <i>TmHisA</i> and URA3 in place of ORFs 1-4 on the orthogonal plasmid (pGKL1)                                 |
| ZZ-Ec506                | This work                          | AR-Ec633               | CEN6/ARS4, ColE1                         | LEU2, KanR                          | Plasmid encoding the error-prone orthogonal DNAP (TP-DNAP1 (L477V, L640Y, I777K, W814N)) driven by the REV1 promoter                                    |
| ZZ-Ec727                | This work                          | ZZ-Ec506               | CEN6/ARS4, ColE1                         | LEU2, KanR                          | Encodes RPL18B promoter > <i>ScHis6</i>                                                                                                                 |
| ZZ-Ec903                | This work                          | ZZ-Ec506               | CEN6/ARS4, ColE1                         | LEU2, KanR                          | Encodes RPL18B promoter > <i>TmHisA</i> -V1-1                                                                                                           |
| ZZ-Ec904                | This work                          | ZZ-Ec506               | CEN6/ARS4, ColE1                         | LEU2, KanR                          | Encodes RPL18B promoter > <i>TmHisA</i> -V1-3                                                                                                           |
| ZZ-Ec905                | This work                          | ZZ-Ec506               | CEN6/ARS4, ColE1                         | LEU2, KanR                          | Encodes RPL18B promoter > <i>TmHisA</i> -V1-4                                                                                                           |
| ZZ-Ec906                | This work                          | ZZ-Ec506               | CEN6/ARS4, ColE1                         | LEU2, KanR                          | Encodes RPL18B promoter > <i>TmHisA</i> -V1-6                                                                                                           |
| ZZ-Ec907                | This work                          | ZZ-Ec506               | CEN6/ARS4, ColE1                         | LEU2, KanR                          | Encodes RPL18B promoter > <i>TmHisA</i> -V2-1                                                                                                           |
| ZZ-Ec908                | This work                          | ZZ-Ec506               | CEN6/ARS4, ColE1                         | LEU2, KanR                          | Encodes RPL18B promoter > <i>TmHisA</i> -V2-2                                                                                                           |
| ZZ-Ec909                | This work                          | ZZ-Ec506               | CEN6/ARS4, ColE1                         | LEU2, KanR                          | Encodes RPL18B promoter > <i>TmHisA</i> -V2-4                                                                                                           |
| ZZ-Ec910                | This work                          | ZZ-Ec506               | CEN6/ARS4, ColE1                         | LEU2, KanR                          | Encodes RPL18B promoter > <i>TmHisA</i> -V3-1                                                                                                           |
| ZZ-Ec911                | This work                          | ZZ-Ec506               | CEN6/ARS4, ColE1                         | LEU2, KanR                          | Encodes RPL18B promoter > <i>TmHisA</i> -V3-2                                                                                                           |
| ZZ-Ec912                | This work                          | ZZ-Ec506               | CEN6/ARS4, ColE1                         | LEU2, KanR                          | Encodes RPL18B promoter > <i>TmHisA</i> -V3-3                                                                                                           |
| ZZ-Ec913                | This work                          | ZZ-Ec506               | CEN6/ARS4, ColE1                         | LEU2, KanR                          | Encodes RPL18B promoter > <i>TmHisA</i> -V3-5                                                                                                           |

|          |           |          |                     |            |                                                  |
|----------|-----------|----------|---------------------|------------|--------------------------------------------------|
| ZZ-Ec914 | This work | ZZ-Ec506 | CEN6/ARS4,<br>ColE1 | LEU2, KanR | Encodes RPL18B promoter ><br><i>TmHisA</i> -V4-1 |
| ZZ-Ec915 | This work | ZZ-Ec506 | CEN6/ARS4,<br>ColE1 | LEU2, KanR | Encodes RPL18B promoter ><br><i>TmHisA</i> -V4-2 |
| ZZ-Ec916 | This work | ZZ-Ec506 | CEN6/ARS4,<br>ColE1 | LEU2, KanR | Encodes RPL18B promoter ><br><i>TmHisA</i> -V4-3 |
| ZZ-Ec917 | This work | ZZ-Ec506 | CEN6/ARS4,<br>ColE1 | LEU2, KanR | Encodes RPL18B promoter ><br><i>TmHisA</i> -V4-4 |
| ZZ-Ec918 | This work | ZZ-Ec506 | CEN6/ARS4,<br>ColE1 | LEU2, KanR | Encodes RPL18B promoter ><br><i>TmHisA</i> -V4-5 |
| ZZ-Ec919 | This work | ZZ-Ec506 | CEN6/ARS4,<br>ColE1 | LEU2, KanR | Encodes RPL18B promoter ><br>wt <i>TmHisA</i>    |



**Table S3. List of yeast strains used in this study.**

| Name    | Genotype                                                                                                                                                                            | Source                              | Parent Strain | Notes                                                                                                                                                                   |
|---------|-------------------------------------------------------------------------------------------------------------------------------------------------------------------------------------|-------------------------------------|---------------|-------------------------------------------------------------------------------------------------------------------------------------------------------------------------|
| F102-2u | F102-2u <i>MATa can1 his4-519 leu2-3,112</i><br>$\rho^0$ + pGKL1 + pGKL2                                                                                                            | ATCC #200585                        | n/a           |                                                                                                                                                                         |
| AR-Y383 | F102-2u <i>MATa can1 his3 leu2<math>\Delta</math>0 ura3<math>\Delta</math>0 trp1 HIS4</i> $\rho^0$ + pGKL1 + pGKL2                                                                  | Ravikumar et al., 2018 <sup>2</sup> | AR-Y292       |                                                                                                                                                                         |
| ZZ-Y454 | F102-2u <i>MATa flo1::URA3 can1 his3 leu2<math>\Delta</math>0 ura3<math>\Delta</math>0 trp1 HIS4</i> $\rho^0$ + pGKL1 + pGKL2                                                       | This work                           | AR-Y383       | AR-Y383 transformed with GA-DNA- <i>flo1URA3</i>                                                                                                                        |
| ZZ-Y455 | F102-2u <i>MATa flo1 can1 his3 leu2<math>\Delta</math>0 ura3<math>\Delta</math>0 trp1 HIS4</i> $\rho^0$ + pGKL1 + pGKL2                                                             | This work                           | ZZ-Y454       | ZZ-Y454 streaked on solid media containing 5-FOA and confirmed with a negative flocculation phenotype                                                                   |
| GA-Y235 | F102-2u <i>MATa flo1 can1 his3 leu2<math>\Delta</math>0 ura3<math>\Delta</math>0 trp1 HIS4 dfr1::KanMX</i> $\rho^0$ + pGKL1 + pGKL2+GA-Ec51                                         | This work                           | ZZ-Y455       | ZZ-Y455 transformed with GA-Ec51                                                                                                                                        |
| ZZ-Y431 | F102-2u <i>MATa flo1 can1 his3 leu2<math>\Delta</math>0 ura3<math>\Delta</math>0 trp1 HIS4 dfr1::KanMX</i> $\rho^0$ + p1- FullDelPol-W-mK-PfDHFR-1*(TAA) + pGKL1 + pGKL2+GA-Ec51    | This work                           | GA-Y235       | GA-Y235 transformed with GA-Ec64                                                                                                                                        |
| ZZ-Y435 | F102-2u <i>MATa flo1 can1 his3 leu2<math>\Delta</math>0 ura3<math>\Delta</math>0 trp1 HIS4 dfr1::KanMX</i> $\rho^0$ + p1- FullDelPol-W-mK-PfDHFR-1*(TAA) + pGKL1 + pGKL2 + AR-Ec633 | This work                           | ZZ-Y431       | GA-Y235 transformed with AR-Ec633                                                                                                                                       |
| ZZ-Y292 | F102-2u <i>MATa can1 leu2<math>\Delta</math>0 ura3<math>\Delta</math>0 his6::KanMX HIS4</i> $\rho^0$ + pGKL1 + pGKL2                                                                | This work                           | AR-Y288       | AR-Y288 transformed with PCR product from Yeast Knockout Collection strain with <i>his6</i> deleted with primers TCATCATCAAGGGTCATCTTTTAT and GAAAAAGGTTGCCTCAATATTGTTA |

|            |                                                                                                                                                   |              |            |                                                                                                                                                                                            |
|------------|---------------------------------------------------------------------------------------------------------------------------------------------------|--------------|------------|--------------------------------------------------------------------------------------------------------------------------------------------------------------------------------------------|
| ZZ-Y299    | F102-2u <i>MATa can1 leu2Δ0 ura3Δ0 trp1Δ0 his6::KanMX HIS4</i> ρ <sup>0</sup> + pGKL1 + pGKL2                                                     | This work    | ZZ-Y292    | ZZ-Y292 transformed with ZZ-Ec482 and linear DNA corresponding to 40 basepairs upstream and downstream of <i>TRP1</i> . The strain was restreaked x2 on YPD solid media to remove ZZ-Ec482 |
| ZZ-YT17-A3 | F102-2u <i>MATa can1 leu2Δ0 ura3Δ0 trp1Δ0 his6::KanMX HIS4</i> ρ <sup>0</sup> + p1-FullDelPol- <i>TmHisA-URA3</i> + pGKL2 + ZZ-Ec506              | This work    | ZZ-Y299    | ZZ-Y299 transformed with ZZ-Ec506 and <i>ScaI</i> -digested ZZ-Ec475                                                                                                                       |
| ZZ-Y323    | F102-2u <i>MATa can1 leu2Δ0 ura3Δ0 trp1Δ0 his6::KanMX HIS4 flo1::NatMX</i> ρ <sup>0</sup> + p1-FullDelPol- <i>TmHisA-URA3</i> + pGKL2 + pZZ-Ec506 | This work    | ZZ-YT17-A3 | ZZ-Y299 transformed with linear DNA containing 500 basepairs upstream of <i>FLO1</i> , <i>NatMX</i> , and 500 basepairs downstream of <i>FLO1</i>                                          |
| BY4741     | <i>MATa his3Δ1 leu2Δ0 met15Δ0 ura3Δ0</i> ρ <sup>+</sup>                                                                                           | ATCC #201388 |            |                                                                                                                                                                                            |
| ZZ-Y332    | BY4741 <i>MATa HIS3 leu2Δ0 met15Δ0 ura3Δ0</i> ρ <sup>+</sup>                                                                                      | This work    | BY4741     | BY4741 transformed with HIS3 PCR from F102-2u                                                                                                                                              |
| ZZ-Y336    | BY4741 <i>MATa HIS3 leu2Δ0 met15Δ0 ura3Δ0 his6::KanMX</i> ρ <sup>+</sup>                                                                          | This work    | ZZ-Y332    | ZZ-Y332 transformed with PCR product from Yeast Knockout Collection strain with <i>his6</i> deleted with primers TCATCATCAAGGGTCATCTTTTAT and GAAAAAGGTTGCCTCAATATTGTTA                    |
| ZZ-Y354    | BY4741 <i>MATa HIS3 leu2Δ0 met15Δ0 ura3Δ0 trp1Δ0 his6::KanMX</i> ρ <sup>+</sup>                                                                   | This work    | ZZ-Y336    | ZZ-Y292 transformed with ZZ-Ec482 and linear DNA corresponding to 40 basepairs upstream and downstream of <i>TRP1</i> . The strain was restreaked x2 on YPD solid media to remove ZZ-Ec482 |

## **References**

- (27) Javanpour, A. A., Liu, C. C. (2019) Genetic Compatibility and Extensibility of Orthogonal Replication. *ACS Synth. Biol.*, 8, 1249–1256.
